# Supplementary material for: ETV7-Mediated DNAJC15 Repression Leads to Doxorubicin Resistance in Breast Cancer Cells
Source: PubMed Central journal article supplement — Neoplasia. 2018 Jul 17;20(8):857–70. doi: 10.1016/j.neo.2018.06.008 (PMC6077117; doi:10.1016/j.neo.2018.06.008), 2018-07-17
Supplement: mmc1.pdf [file mmc1.pdf]

# Supplementary Figure 1

**A**

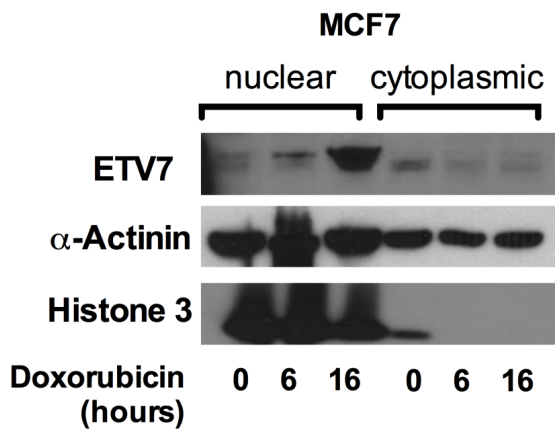

**B**

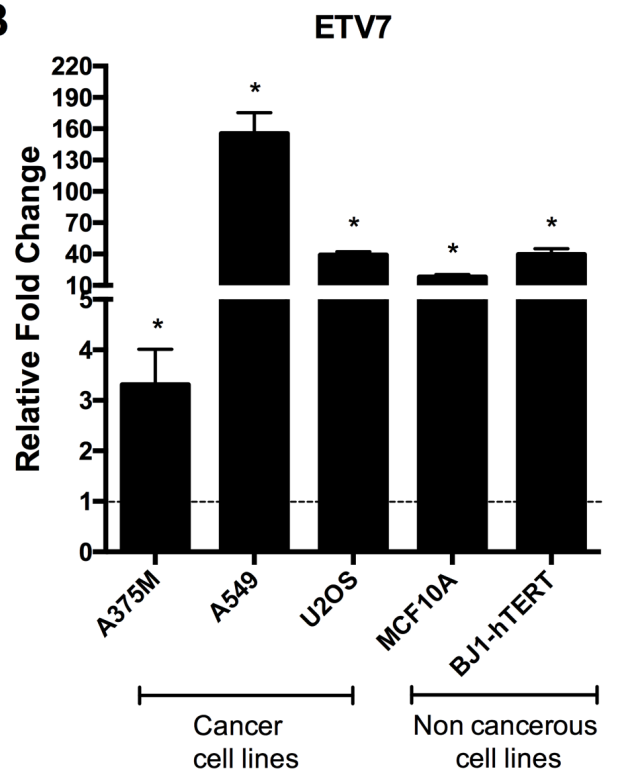

# Supplementary Figure 2

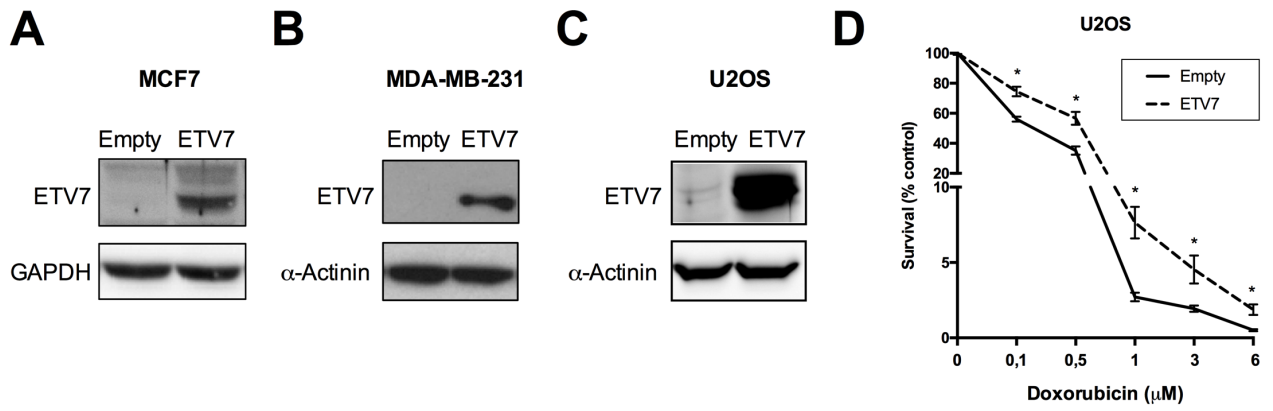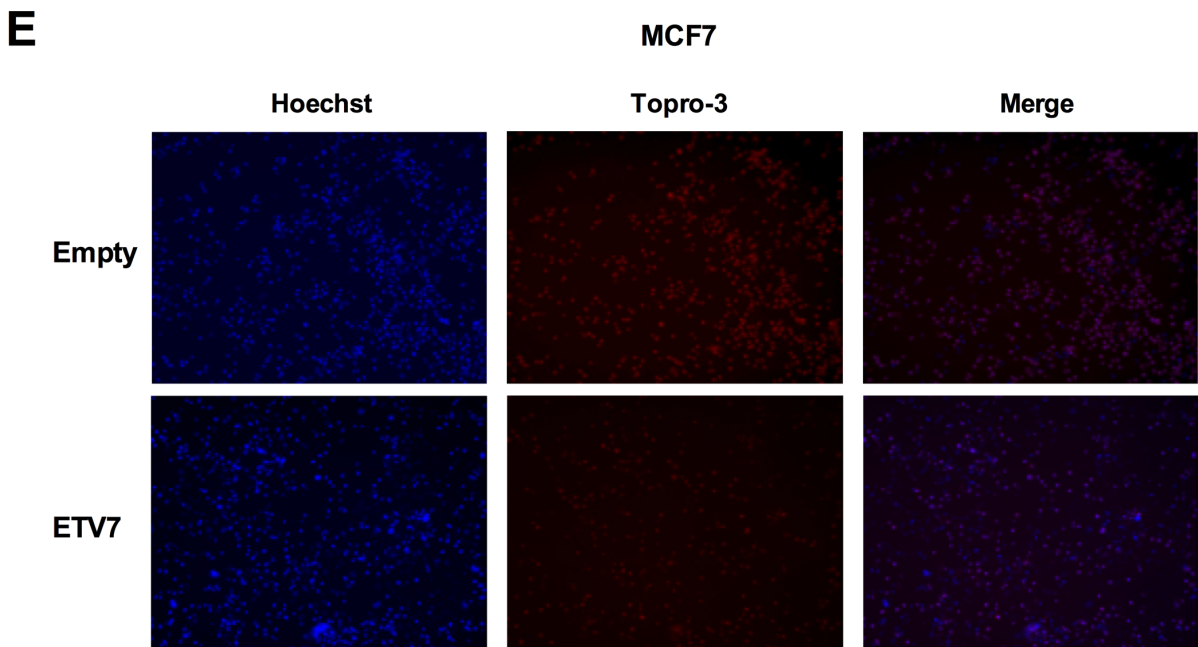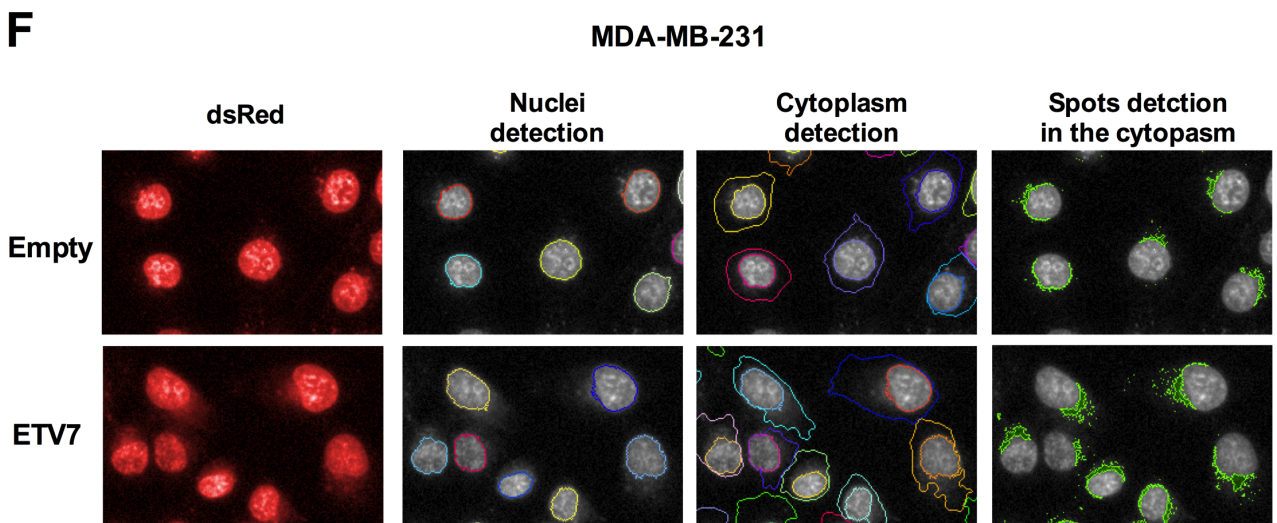

# Supplementary Figure 3

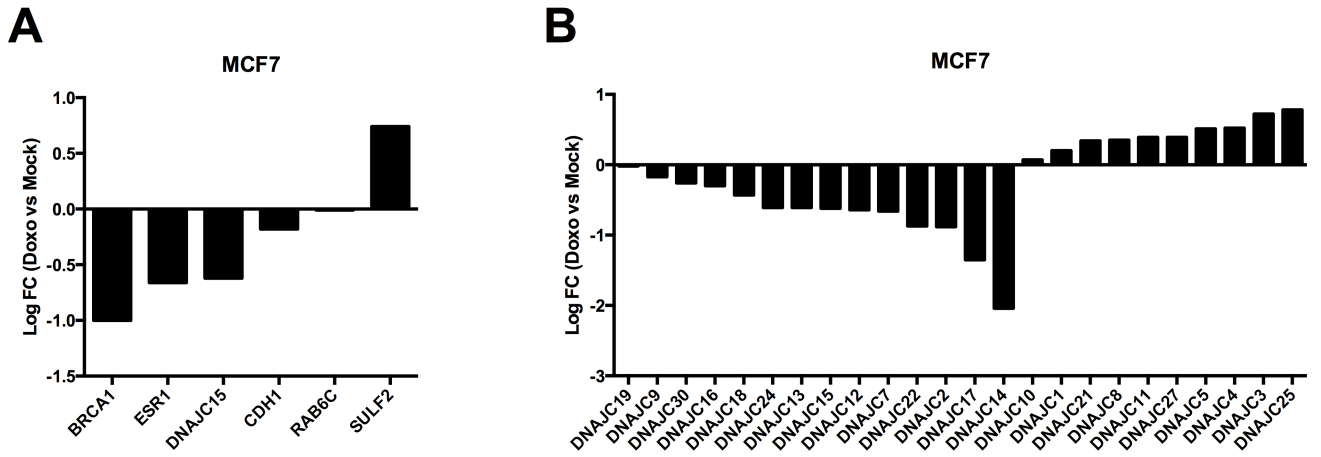

# Supplementary Figure 4

**A**

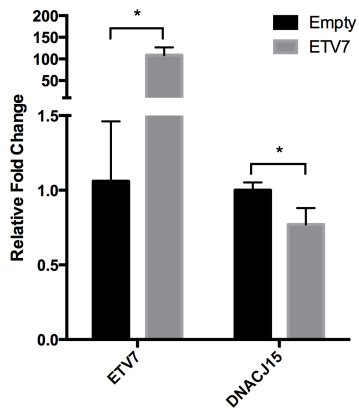

**B**

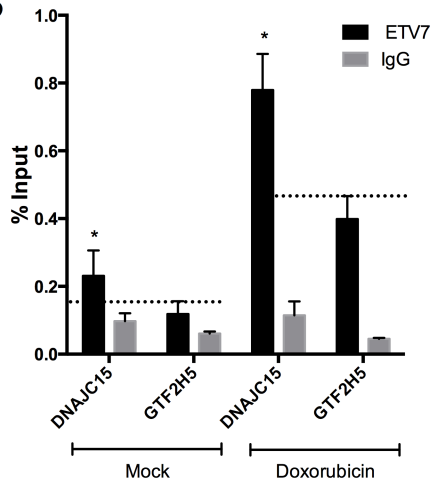

**C**

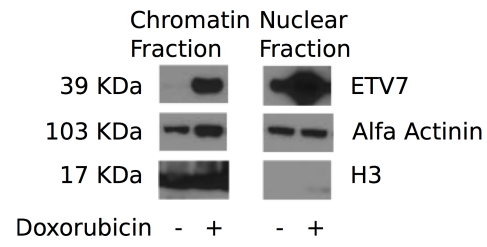

# Supplementary Figure 5

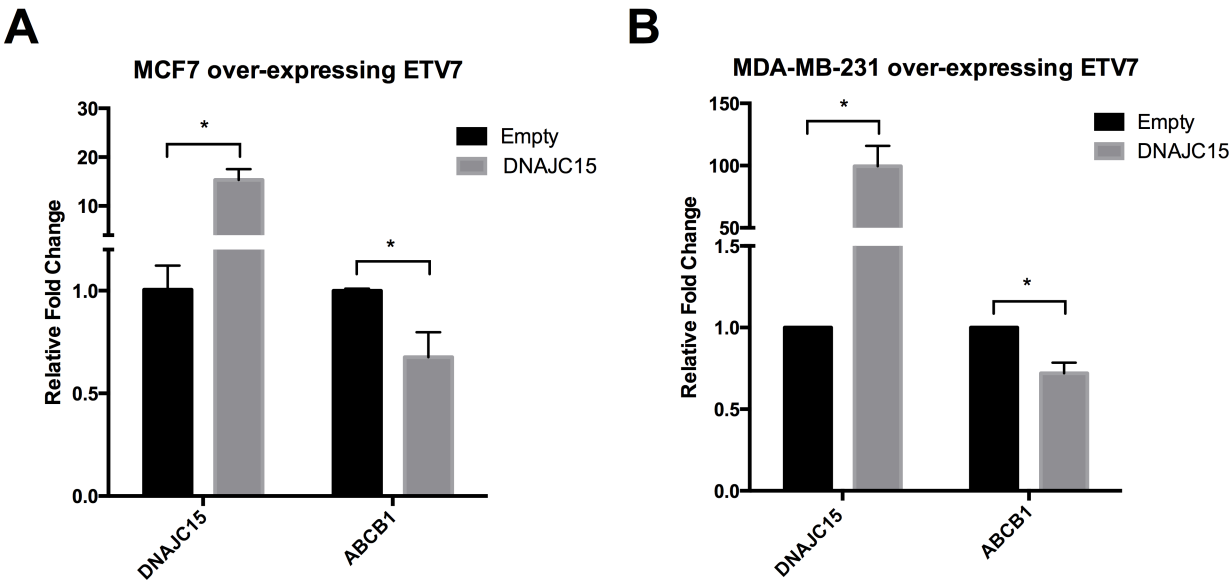

# Supplementary Figure 6

**A**

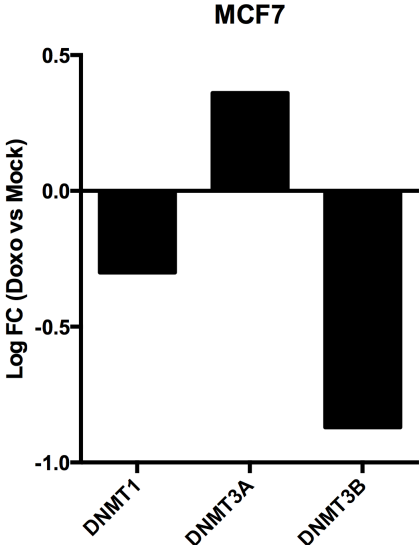

**B**

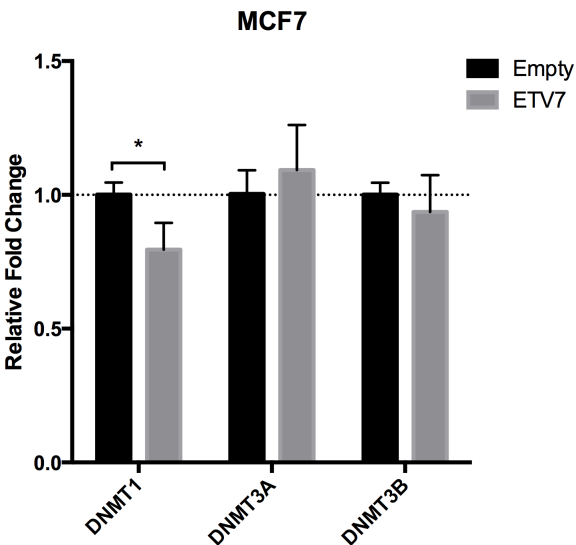

**Supplementary Table 1.**

| <b>PRIMERS used for RT-qPCR</b>   | <b>sequence</b>         |
|-----------------------------------|-------------------------|
| ETV7-Fw                           | CAAGATCTTCCGAGTTGTGGA   |
| ETV7-Rv                           | G TTCACCCGGTTCTTGTGAT   |
| DNAJC22-Fw                        | AGGACAGCTTGGGTTGGATG    |
| DNAJC22-Rv                        | CGCTCCTATCTGTAGTGCTCAA  |
| DNAJC17-Fw                        | CTAGGCATTGAGGAGAAGGCA   |
| DNAJC17-Rv                        | AGAGTTCAGCTGCTCTGGGATT  |
| DNAJC2-Fw                         | GGCTCGGAGTGAGAGGTAGA    |
| DNAJC2-Rv                         | GAGTGTAGAGGCAGAGGTCAG   |
| DNAJC7-Fw                         | CGGAGCTGCTCTATGCTCCA    |
| DNAJC7-Rv                         | AAAGTCTCTGCTTCCCTCTTCG  |
| DNAJC14-Fw                        | G TAGCTAGTGGGCGCTACTG   |
| DNAJC14-Rv                        | GCTGCTCGCAAACCTTGAA     |
| DNAJC15-Fw                        | TGGTGT CATCGCTCCAGTTG   |
| DNAJC15-Rv                        | ATGCGTAGCGACCTGCAAAT    |
| ABCB1-Fw                          | TGCCTATGGAGACAACAGCC    |
| ABCB1-Rv                          | TGAAGGCATGTATGTTGGCCT   |
| YWHAZ-Fw                          | CAACACATCCTATCAGACTGGG  |
| YWHAZ-Rv                          | AATGTATCAAGTTCAGCAATGGC |
| B2M-Fw                            | AGGCTATCCAGCGTACTCCA    |
| B2M-Rv                            | TGGATGAAACCCAGACACA     |
| GAPDH-Fw                          | TCCAAAATCAAGTGGGGCGA    |
| GAPDH-Rv                          | AGTAGAGGCAGGGATGATGT    |
| DNMT1-Fw                          | ACATCCTGGACAAGCACCG     |
| DNMT1-Rv                          | TTTAGCTGAGGCACTCTCTCG   |
| DNMT3A-Fw                         | GTGTCTTGGTGGATGACGGG    |
| DNMT3A-Rv                         | CGGCATCAGCTTCTCAACAC    |
| DNMT3B-Fw                         | TAAGTCGAAGGTGCGTCGTG    |
| DNMT3B-Rv                         | CGTCTTCGAGTCTTGTCTCGTA  |
| <b>PRIMERS used for ChIP-qPCR</b> | <b>sequence</b>         |
| DNAJC15-ChIP-Fw                   | TGCGAACAGAAGTTGAGAGTGG  |
| DNAJC15-ChIP-Rv                   | AGTAAGCTCGGAGTCTAGCTGT  |
| GTF2H5-ChIP-Fw                    | GAAGCGAAGTAAGAAGTATGGCA |
| GTF2H5-ChIP-Rv                    | GGCCCTACTAAGAGGCAAAGG   |
| GAPDH-ChIP-Fw                     | AAAAGCGGGGAGAAAGTAGG    |
| GAPDH-ChIP-Rv                     | CTAGCCTCCCGGTTTCTCT     |
